# Supplementary material for: Tailored growth of graphene oxide liquid crystals with controlled polymer crystallization in GO-polymer composites
Source: Royal Society of Chemistry journal article supplement (doi:10.1039/d0nr07858a), 2021-01-01
Supplement: d0nr07858a1.pdf [file d0nr07858a1.pdf]

Supporting Information

# Tailored Growth of Graphene Oxide Liquid Crystals with Controlled Polymer Crystallization in GO- polymer Composites

*Soh Jin Mun,<sup>†</sup> Yul Hui Shim,<sup>†</sup> Geon Woong Kim,<sup>†</sup> Sung Hwan Koo,<sup>‡</sup> Hyungju-Ahn, Tae Joo  
Shin, Sang Ouk Kim,<sup>‡</sup> and So Youn Kim<sup>\*,†</sup>*

<sup>†</sup>School of Energy and Chemical Engineering and §UNIST Central Research Facilities & School  
of Natural Science, Ulsan National Institute of Science and Technology, Ulsan, 44919, Republic  
of Korea

<sup>‡</sup> National Creative Research Initiative Center for Multi-Dimensional Directed Nanoscale  
Assembly, Department of Materials Science & Engineering, KAIST, Daejeon, 34141, Republic of  
Korea Institute of Science and Technology, Ulsan, 44919, Republic of Korea

KEYWORDS. Graphene oxide, polymer crystals, cooling rate, liquid crystal.

To confirm the possible reduction of GO during the thermal experiment, Raman spectroscopy experiment is performed with alpha300R. We found nearly no reduction of GO during the thermal history of the experiment based on D/G band intensity of the spectra. No systematic changes in the ratio of intensity (D band/ G band) were noted at GO-pure, GO-fast, GO-slow. Noting that the D band results from the presence of oxygen groups in the graphene layer and G band is related to the sp<sup>2</sup> hybridized carbon atoms, the  $I_D/I_G$  ratio provides the structural information for the GO.

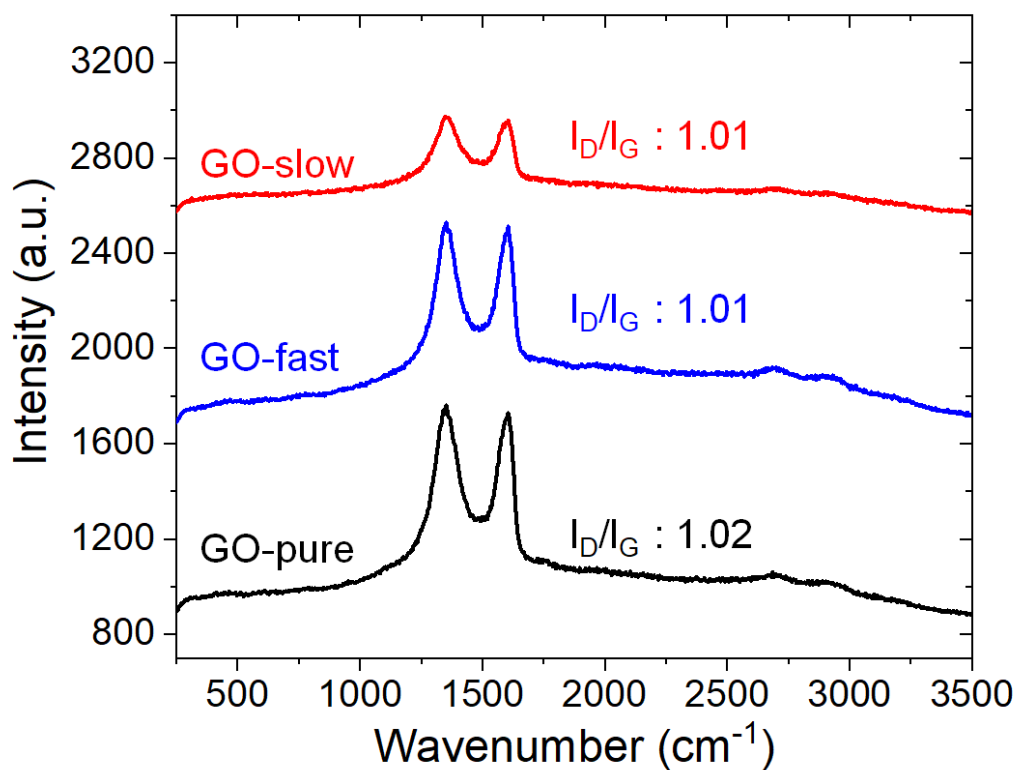

Figure S1. The Raman spectroscopy of GO-pure, GO-fast and GO-slow

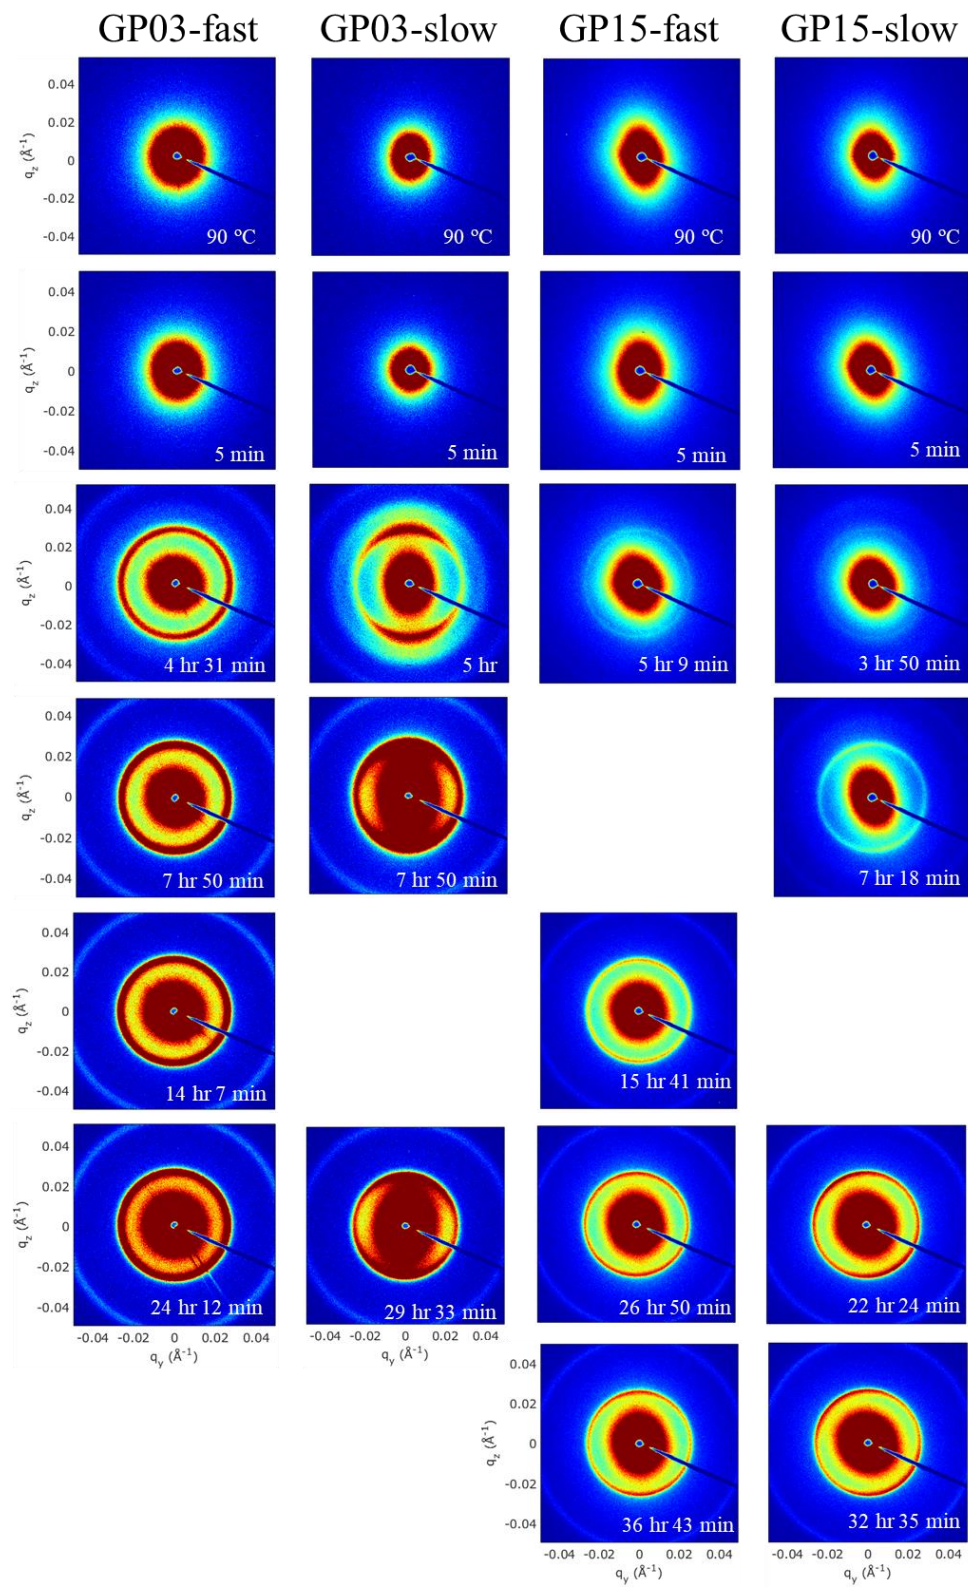

Figure S2. All in situ SAXS 2D patterns of GP samples at different holding times

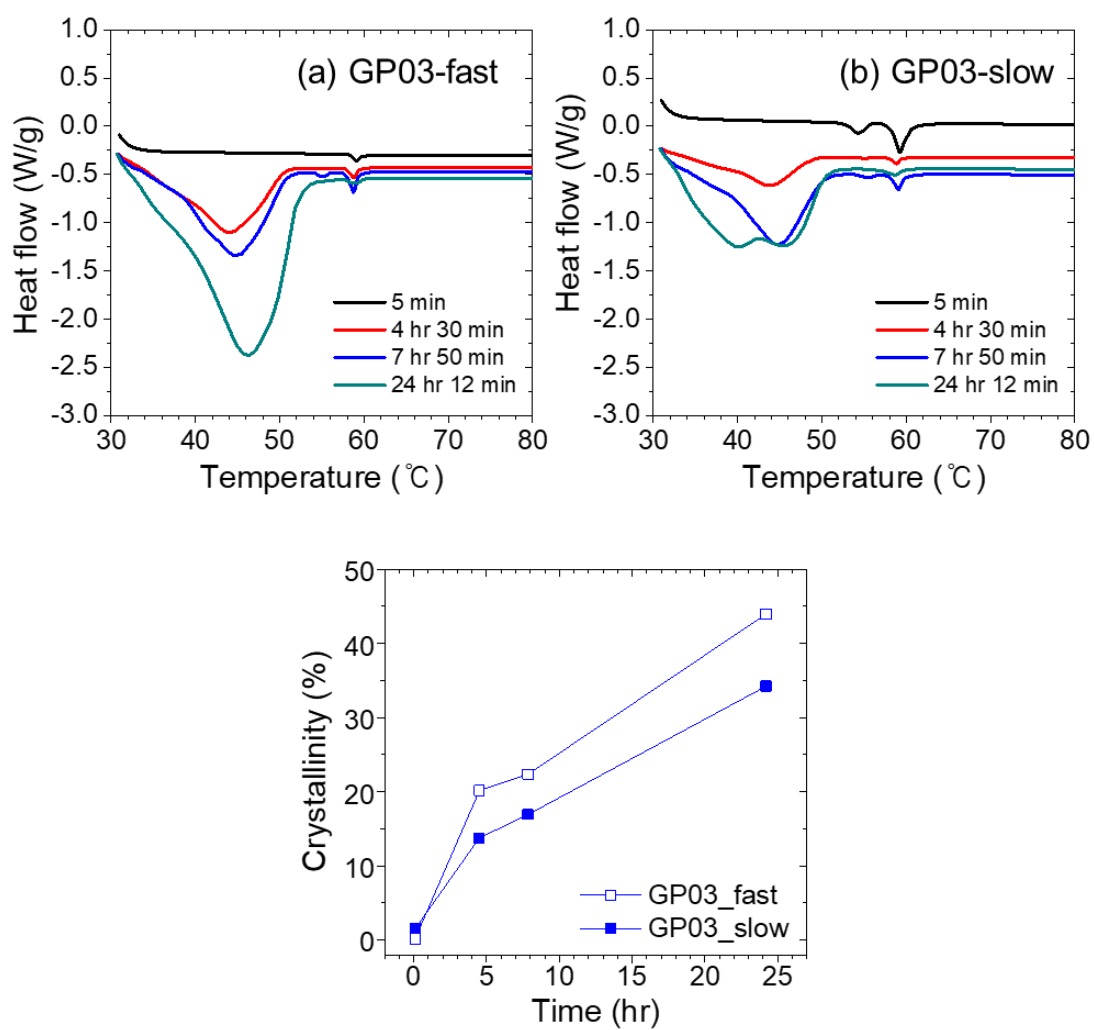

Figure S3. DSC endotherm of GP03-fast (a) and GP03-slow (b), and the calculated degree of crystallinity for GP03 (c)

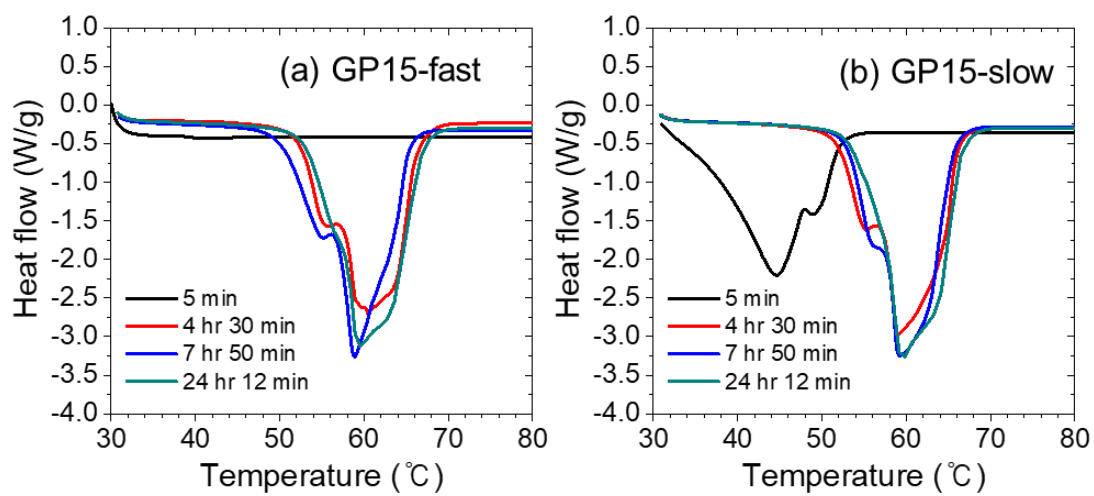

Figure S4. DSC endotherm of (a) GP15-fast and (b) GP15-slow

(a) GP15-fast

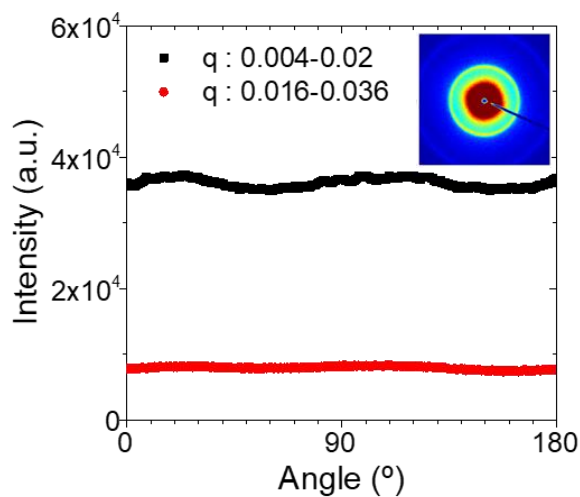

(b) GP15-slow

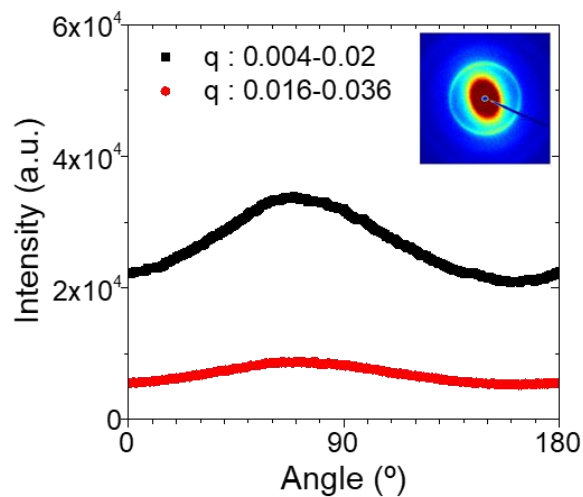

Figure S5. Angle distribution curves of scattering intensity for (a) GP15-fast at the holding time of 15hr 41m and (b) GP15-slow at 7hr 18m

(a)

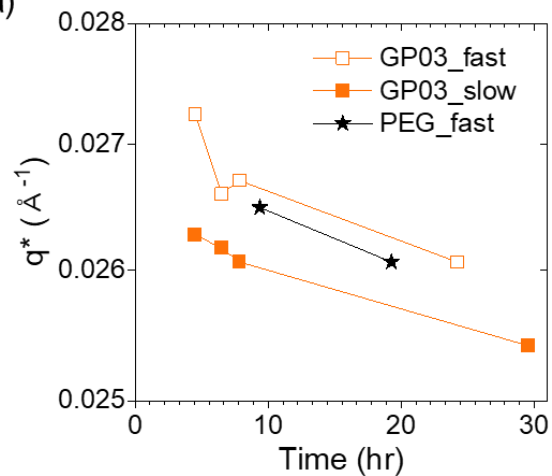

(b)

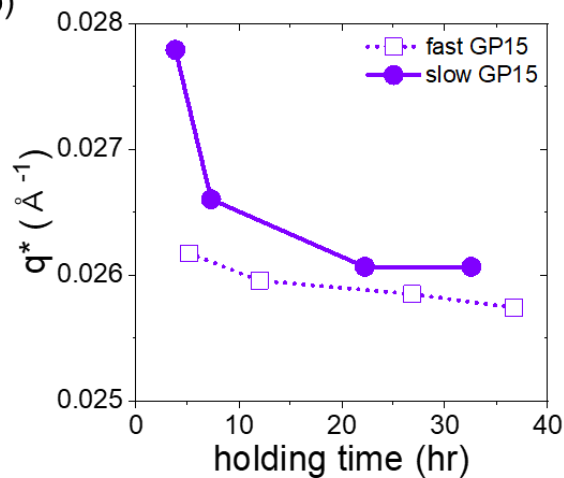

Figure S6. The value of  $q^*$  from crystal lamellae as a function of time of (a) GP03 and (b) GP15

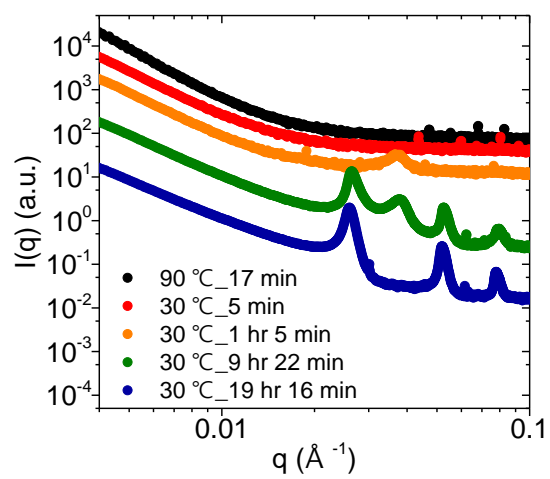

Figure S7. 1D profile of PEG without GO with varying holding time for fast cooling rate
